# Supplementary material
Source: PubMed Central journal article supplement (PMC9945061)
Supplement: jama-e230268-s002.pdf [file jama-e230268-s002.pdf]

Le Guen Y, Raulin A-C, Logue MW, et al. Association of African ancestry-specific APOE missense variant R145C with risk of Alzheimer disease. *JAMA*. Published February 21, 2023. doi:10.1001/jama.2023.0268

## Data Sharing Statement

### Data

**Data available:** Yes

**Data types:** Deidentified participant data

**How to access data:** Data used in preparation of this manuscript can be obtained upon application at: - dbGaP ([https://www.ncbi.nlm.nih.gov/gap/advanced\\_search/](https://www.ncbi.nlm.nih.gov/gap/advanced_search/)) - NIAGADS and NIAGADS DSS (<https://www.niagads.org/>) - LONI (<https://ida.loni.usc.edu/>) - Synapse (<https://adknowledgeportal.synapse.org/>) - RADC Rush (<https://www.radc.rush.edu/>) - NACC (<https://nacccdata.org/>) eTables 3 and 4 provide the details of repositories and accession number per cohort-platform group.

**When available:** With publication

### Supporting Documents

**Document types:** None

### Additional Information

**Who can access the data:** Data will be made available to researchers whose proposed use of the data has been approved.

**Types of analyses:** Types of analyses for which the data will be made available are defined in each public database.

**Mechanisms of data availability:** Data will be made available with a signed data access agreement (cf. particular rules for each dataset).
